# Supplementary material for: Let Students Talk about Emergency Remote Teaching Experience: Secondary Students’ Perceptions on Their Experience during the COVID-19 Pandemic
Source: MDPI journal article supplement (doi:10.3390/educsci11060268), 2021-05-29
Supplement: s1 [file s1]

Archive with 1 entries (1 files):
- education-1228830-supplementary.pdf
