# Supplementary material for: Let Students Talk about Emergency Remote Teaching Experience: Secondary Students’ Perceptions on Their Experience during the COVID-19 Pandemic
Source: MDPI journal article supplement (doi:10.3390/educsci11060268), 2021-05-29
Supplement: s1 [file s1 › education-1228830-supplementary.pdf]

# COVID-19 Pandemic and its Impact on Educational Practices

This questionnaire aims to investigate students' experiences and views on the distance education period that followed the schools' lockdown due to the COVID-19 pandemic. Your responses to this survey are extremely valuable contributions to our research and your effort and time spent are sincerely appreciated. The survey should take approximately 10 minutes to complete.

It is anonymous and all your responses will remain strictly confidential. No identifying information such as name, date of birth, or affiliation is requested.

The data collected from this questionnaire will be used solely for the purposes of this research.

By choosing to continue with the completion of the questionnaire, you declare that you understand the purposes of this research and that you give your consent to participate in the study.

Thank you for your time.

If you have any questions or need further information on this research, please contact:

- Dr. Maria Meletiou-Mavrotheris – Professor, European University of Cyprus - Director of the ICT-Enhanced Education Laboratory, [m.mavrotheris@euc.ac.cy](mailto:m.mavrotheris@euc.ac.cy)
- Dr. Konstantinos Katzis - Deputy Dean, Associate Professor, European University of Cyprus, [K.Katzis@euc.ac.cy](mailto:K.Katzis@euc.ac.cy)

\* Απαιτείται

## Demographics

Please answer the following questions:

1. Please state your gender \*

Να επισημαίνεται μόνο μία έλλειψη.

☐ Male

☐ Female

2. Please indicate which grade you're in (for high school students choose the appropriate orientation) \*

*Να επισημαίνεται μόνο μία έλλειψη.*

- ☐ I am a student of a private school that does not follow the structure of public schools (in this case indicate your year of study in the next question)
- ☐ 1st Year of Gymnasium
- ☐ 2nd Year of Gymnasium
- ☐ 3rd Year of Gymnasium
- ☐ 1st Year of high school(Ancient Greek/History)
- ☐ 1st Year of high school (Mathematics-Physics)
- ☐ 1st Year of high school (Mathematics-Economics)
- ☐ 1st Year of high school (Economics-English)
- ☐ 2nd Year of high school (Classical Studies and Humanities)
- ☐ 2nd Year of high school (Foreign Languages and European Studies)
- ☐ 2nd Year of high school (Sciences - Bioscience - Informatics - Technology)
- ☐ 2nd Year of high school (Economics)
- ☐ 2nd Year of high school (Trade and services)
- ☐ 2nd Year of high school (Arts)
- ☐ 3rd Year of high school (Classical Studies and Humanities)
- ☐ 3rd Year of high school (Foreign Languages and European Studies)
- ☐ 3rd Year of high school (Sciences - Bioscience - Informatics - Technology)
- ☐ 3rd Year of high school (Economics)
- ☐ 3rd Year of high school (Trade and services)
- ☐ 3rd Year of high school (Arts)

3. Please indicate your year of study (question for private school students that do not follow the above structure) \*

*Να επισημαίνεται μόνο μία έλλειψη.*

- ☐ I am in a school (public or private) that follows the structure of public schools
- ☐ Year 1
- ☐ Year 2
- ☐ Year 3
- ☐ Year 4
- ☐ Year 5
- ☐ Year 6
- ☐ Year 7

4. I go to a \*

*Να επισημαίνεται μόνο μία έλλειψη.*

- ☐ Public school
- ☐ Private school

5. I have been using technology for \*

*Να επισημαίνεται μόνο μία έλλειψη.*

- ☐ Less than 2 years
- ☐ 2 to 5 years
- ☐ 6 to 9 years
- ☐ 9 years or more

6. 6. Which of the following statements do you think best describes your attitude towards the use of new technologies in your daily life? \*

*Να επισημαίνεται μόνο μία έλλειψη.*

- ☐ I don't like new technologies and I only use them when necessary
- ☐ I am usually one of the last in my group of friends to use a new technology
- ☐ I usually decide to use a new technological tool when most people I know of are already using it
- ☐ I like new technologies and I use them before most people
- ☐ I love new technologies and I am always among the first to experiment with and use them

7. How would you describe your level of familiarity with technology? \*

*Να επισημαίνεται μόνο μία έλλειψη.*

- ☐ I don't use it.
- ☐ Beginner
- ☐ Intermediate
- ☐ Advanced
- ☐ Expert

Equipment and  
functionality

Please answer by choosing the answer that best expresses you.

8. Please choose to indicate which of the following devices you have access to at home and whether they are for your own use only or if you share them with other members of your family \*

*Να επισημαίνεται μόνο μία έλλειψη ανά σειρά.*

|            | It is<br>used<br>only by<br>me | I share it with<br>other members of<br>my family | I have access to it but it<br>belongs to other members<br>of my family | We don't<br>have one<br>at home |
|------------|--------------------------------|--------------------------------------------------|------------------------------------------------------------------------|---------------------------------|
| PC/Laptop  | <input type="radio"/>          | <input type="radio"/>                            | <input type="radio"/>                                                  | <input type="radio"/>           |
| Tablet     | <input type="radio"/>          | <input type="radio"/>                            | <input type="radio"/>                                                  | <input type="radio"/>           |
| Smartphone | <input type="radio"/>          | <input type="radio"/>                            | <input type="radio"/>                                                  | <input type="radio"/>           |

9. How easy was it for you to get on the platform used for distance learning? \*

*Να επισημαίνεται μόνο μία έλλειψη.*

- ☐ Very easy (I didn't face any difficulties)
- ☐ Easy (I had some minor issues but I resolved them easily)
- ☐ Difficult (I had some issues and it took me a long time to resolve them)
- ☐ Very Difficult (I had some major issues and it took me a very long time to resolve them)

10. How often did you use each of the following platforms during the distance learning period? \* \*

*Να επισημαίνεται μόνο μία έλλειψη ανά σειρά.*

|                      | Always (main platform) | Often                 | Sometimes             | Rarely                | Never                 |
|----------------------|------------------------|-----------------------|-----------------------|-----------------------|-----------------------|
| Zoom                 | <input type="radio"/>  | <input type="radio"/> | <input type="radio"/> | <input type="radio"/> | <input type="radio"/> |
| Webex                | <input type="radio"/>  | <input type="radio"/> | <input type="radio"/> | <input type="radio"/> | <input type="radio"/> |
| MS Teams             | <input type="radio"/>  | <input type="radio"/> | <input type="radio"/> | <input type="radio"/> | <input type="radio"/> |
| Google Hangouts Meet | <input type="radio"/>  | <input type="radio"/> | <input type="radio"/> | <input type="radio"/> | <input type="radio"/> |
| Jitsi                | <input type="radio"/>  | <input type="radio"/> | <input type="radio"/> | <input type="radio"/> | <input type="radio"/> |
| Other...             | <input type="radio"/>  | <input type="radio"/> | <input type="radio"/> | <input type="radio"/> | <input type="radio"/> |

11. Please elaborate on the choice “Other” (if selected in the previous question)

---

12. In your attempt to download/view learning material posted online, or attend an online class, did you encounter internet connection issues? \*

*Να επισημαίνεται μόνο μία έλλειψη.*

- ☐ No, I never had such a problem
- ☐ Sometimes the internet was slow when attempting to join my online classes but I didn't have a problem downloading or viewing the learning material
- ☐ Yes, I had trouble attending my online classes and it took me a long time to download or view the learning material
- ☐ I don't have an internet connection at home and I had to attend the class and download the material from elsewhere

## 13. How much space do you have available at home to study? \*

*Να επισημαίνεται μόνο μία έλλειψη.*

- ☐ I have a lot of rooms at home that I can use as an improvised classroom or an office
- ☐ I have one room at home that I use exclusively for study purposes
- ☐ I have one room or part of a room that I use for studying, and is also used for other purposes, such as sleeping, cooking or watching TV
- ☐ My house is very small or we are a big family so I don't have a dedicated study area. In order to be able to study, I move around all day long from one place to another

## 14. How serious have the following issues been for you in your transition to distance learning? (Select all applicable.) \*

*Να επισημαίνεται μόνο μία έλλειψη ανά σειρά.*

|                                                                                                | Very serious          | Moderately serious    | Slightly serious      | Not serious at all    |
|------------------------------------------------------------------------------------------------|-----------------------|-----------------------|-----------------------|-----------------------|
| My teachers' lack of familiarity with the technologies or tools we had to use                  | <input type="radio"/> | <input type="radio"/> | <input type="radio"/> | <input type="radio"/> |
| My lack of familiarity with the technologies or tools we had to use                            | <input type="radio"/> | <input type="radio"/> | <input type="radio"/> | <input type="radio"/> |
| My inability to access reliable software/communication tools (e.g. Teams, Zoom, Skype, Google) | <input type="radio"/> | <input type="radio"/> | <input type="radio"/> | <input type="radio"/> |
| My lack of access to a reliable internet connection (fast and stable)                          | <input type="radio"/> | <input type="radio"/> | <input type="radio"/> | <input type="radio"/> |
| My lack of access to a reliable digital device (e.g. desktop, laptop, tablet)                  | <input type="radio"/> | <input type="radio"/> | <input type="radio"/> | <input type="radio"/> |

15. To what extent did each of the following educational issues make it difficult for you to switch to distance learning? \*

*Να επισημαίνεται μόνο μία έλλειψη ανά σειρά.*

|                                                                                                         | To a great extent     | To a moderate extent  | To a small extent     | Not at all            |
|---------------------------------------------------------------------------------------------------------|-----------------------|-----------------------|-----------------------|-----------------------|
| It was not clear what the teacher was asking me to do during the online class session, or for homework  | <input type="radio"/> | <input type="radio"/> | <input type="radio"/> | <input type="radio"/> |
| Personally I prefer face-to-face classes                                                                | <input type="radio"/> | <input type="radio"/> | <input type="radio"/> | <input type="radio"/> |
| Some activities were hard for me or I couldn't understand what I had to do.                             | <input type="radio"/> | <input type="radio"/> | <input type="radio"/> | <input type="radio"/> |
| I couldn't concentrate during class                                                                     | <input type="radio"/> | <input type="radio"/> | <input type="radio"/> | <input type="radio"/> |
| I couldn't see my classmates                                                                            | <input type="radio"/> | <input type="radio"/> | <input type="radio"/> | <input type="radio"/> |
| I couldn't ask as many questions as I wanted or discuss with my teacher                                 | <input type="radio"/> | <input type="radio"/> | <input type="radio"/> | <input type="radio"/> |
| I could not participate in extracurricular activities (e.g. educational trips, visits to museums, etc.) | <input type="radio"/> | <input type="radio"/> | <input type="radio"/> | <input type="radio"/> |

Distance education and learning material

Please answer by choosing the answer that best describes you.

16. How long did it take your teachers after the school lockdown to begin teaching you online? \*

*Να επισημαίνεται μόνο μία έλλειψη.*

- ☐ Only one day
- ☐ Less than a week
- ☐ Two to three weeks
- ☐ One month or more

17. During the school lockdown period... \*

*Να επισημαίνεται μόνο μία έλλειψη.*

- ☐ We covered new material in all of my classes
- ☐ In some of my classes we covered new material, and in others we only did revisions
- ☐ In some of my classes we covered new material, in others we did revisions, and in others there were no online class sessions at all
- ☐ In some of my classes we covered new material, and in others there were no online class sessions at all
- ☐ In some of my classes we had revisions, and in others there were no online class sessions at all
- ☐ We only had revisions in all my classes

18. In which of the following subjects did you have online sessions (the teacher was teaching while you were attending from home at the same time)? Indicate with a YES only the subjects in which you had online sessions and ignore the rest.

*Να επισημαίνεται μόνο μία έλλειψη ανά σειρά.*

|                                                          | Yes                   | No                    |
|----------------------------------------------------------|-----------------------|-----------------------|
| Modern Greek/ Citizen Education                          | <input type="radio"/> | <input type="radio"/> |
| Ancient Greek                                            | <input type="radio"/> | <input type="radio"/> |
| Mathematics                                              | <input type="radio"/> | <input type="radio"/> |
| Physics                                                  | <input type="radio"/> | <input type="radio"/> |
| Chemistry                                                | <input type="radio"/> | <input type="radio"/> |
| Biology                                                  | <input type="radio"/> | <input type="radio"/> |
| Geography                                                | <input type="radio"/> | <input type="radio"/> |
| History/ History of Cyprus                               | <input type="radio"/> | <input type="radio"/> |
| English                                                  | <input type="radio"/> | <input type="radio"/> |
| Foreign Language (e.g. French, Spanish, German, Russian) | <input type="radio"/> | <input type="radio"/> |
| Informatics or Computer Applications                     | <input type="radio"/> | <input type="radio"/> |
| Art, Graphic Design                                      | <input type="radio"/> | <input type="radio"/> |
| Architectural - Technical Design                         | <input type="radio"/> | <input type="radio"/> |
| Theatrical Studies                                       | <input type="radio"/> | <input type="radio"/> |
| Music                                                    | <input type="radio"/> | <input type="radio"/> |
| Physical Education / First Aid                           | <input type="radio"/> | <input type="radio"/> |
| Religious Studies                                        | <input type="radio"/> | <input type="radio"/> |
| Design and Technology                                    | <input type="radio"/> | <input type="radio"/> |
| Home Economics                                           | <input type="radio"/> | <input type="radio"/> |
| Latin                                                    | <input type="radio"/> | <input type="radio"/> |
| Economics                                                | <input type="radio"/> | <input type="radio"/> |

|                        |                       |                       |
|------------------------|-----------------------|-----------------------|
| Accounting             | <input type="radio"/> | <input type="radio"/> |
| <hr/>                  |                       |                       |
| Marketing and Commerce | <input type="radio"/> | <input type="radio"/> |
| <hr/>                  |                       |                       |
| Other                  | <input type="radio"/> | <input type="radio"/> |
| <hr/>                  |                       |                       |

19. If you selected "YES" for "Other", please indicate the subject or subjects in which you had online sessions but is/are not listed above

---

20. In which of the following courses have you been provided with learning material through the online platform? Indicate with a YES only the subjects for which you were provided with learning material through the online platform and ignore the rest.

*Να επισημαίνεται μόνο μία έλλειψη ανά σειρά.*

|                                                          | Yes                   | No                    |
|----------------------------------------------------------|-----------------------|-----------------------|
| Modern Greek/ Citizen Education                          | <input type="radio"/> | <input type="radio"/> |
| Ancient Greek                                            | <input type="radio"/> | <input type="radio"/> |
| Mathematics                                              | <input type="radio"/> | <input type="radio"/> |
| Physics                                                  | <input type="radio"/> | <input type="radio"/> |
| Chemistry                                                | <input type="radio"/> | <input type="radio"/> |
| Biology                                                  | <input type="radio"/> | <input type="radio"/> |
| Geography                                                | <input type="radio"/> | <input type="radio"/> |
| History/ History of Cyprus                               | <input type="radio"/> | <input type="radio"/> |
| English                                                  | <input type="radio"/> | <input type="radio"/> |
| Foreign Language (e.g. French, Spanish, German, Russian) | <input type="radio"/> | <input type="radio"/> |
| Informatics or Computer Applications                     | <input type="radio"/> | <input type="radio"/> |
| Art, Graphic Design                                      | <input type="radio"/> | <input type="radio"/> |
| Architectural - Technical Design                         | <input type="radio"/> | <input type="radio"/> |
| Theatrical Studies                                       | <input type="radio"/> | <input type="radio"/> |
| Music                                                    | <input type="radio"/> | <input type="radio"/> |
| Physical Education / First Aid                           | <input type="radio"/> | <input type="radio"/> |
| Religious Studies                                        | <input type="radio"/> | <input type="radio"/> |
| Design and Technology                                    | <input type="radio"/> | <input type="radio"/> |
| Home Economics                                           | <input type="radio"/> | <input type="radio"/> |
| Latin                                                    | <input type="radio"/> | <input type="radio"/> |
|                                                          | <input type="radio"/> | <input type="radio"/> |

|                        |                       |                       |
|------------------------|-----------------------|-----------------------|
| Economics              |                       |                       |
| Accounting             | <input type="radio"/> | <input type="radio"/> |
| Marketing and Commerce | <input type="radio"/> | <input type="radio"/> |
| Other                  | <input type="radio"/> | <input type="radio"/> |

21. If you selected “YES” for “Other”, please indicate the subject or subjects that is/are not included in the list above

---

22. During the distance learning period, you attended synchronous online sessions, i.e. sessions where the teacher was teaching and you were attending virtually at the same time. During these class sessions, it was... \*

*Να επισημαίνεται μόνο μία έλλειψη.*

- ☐ easier for me to participate in the lesson than in the face-to-face classroom
- ☐ just as easy for me to participate in the lesson as in the face-to-face classroom
- ☐ more difficult for me to participate in the lesson than in the face-to-face classroom
- ☐ We did not have any synchronous class sessions

23. During the online classes, various tools and technologies were employed for teaching and learning. In the grid that follows, some of them are mentioned. We would like you to indicate how helpful you found each of these tools/technologies \*

*Να επισημαίνεται μόνο μία έλλειψη ανά σειρά.*

|                                                                                             | Extremely             | A lot                 | Slightly              | Not at all            | It didn't happen/ it wasn't provided |
|---------------------------------------------------------------------------------------------|-----------------------|-----------------------|-----------------------|-----------------------|--------------------------------------|
| Synchronous instruction (the teacher is teaching while you are participating using your PC) | <input type="radio"/>                |
| Video                                                                                       | <input type="radio"/>                |
| Power Point Presentations                                                                   | <input type="radio"/>                |
| Handouts with theory or clarifications                                                      | <input type="radio"/>                |
| Quizzes                                                                                     | <input type="radio"/>                |
| Online discussion forums                                                                    | <input type="radio"/>                |
| Simulations                                                                                 | <input type="radio"/>                |
| Virtual Laboratories                                                                        | <input type="radio"/>                |
| Social media (e.g., Facebook, Google+, Instagram, Twitter)                                  | <input type="radio"/>                |
| Instant messaging (e.g. Messenger, Viber)                                                   | <input type="radio"/>                |
| Online homework                                                                             | <input type="radio"/>                |

24. From the moment the online courses started, how much time did you spend in total each day in front of the computer/laptop/tablet / mobile phone attending your teachers' online classes, doing your homework, and participating in other extracurricular courses or activities you do outside school (e.g. private lessons, music classes, etc.)? \*

*Να επισημαίνεται μόνο μία έλλειψη.*

- ☐ 0-3 hours
- ☐ 4-6 hours
- ☐ 7-10 hours
- ☐ 11 hours or more

25. Based on your recent experience, which of the following courses has been the most difficult for you to do through distance learning? (Choose only one) \*

*Να επισημαίνεται μόνο μία έλλειψη.*

- ☐ Modern Greek/ Citizen Education
- ☐ Ancient Greek
- ☐ Mathematics
- ☐ Physics
- ☐ Chemistry
- ☐ Biology
- ☐ Geography
- ☐ History/ History of Cyprus
- ☐ English
- ☐ Foreign Language Class (e.g. French, Spanish, German, Russian)
- ☐ Informatics or Computer Applications
- ☐ Art, Graphic Design
- ☐ Architectural - Technical Design
- ☐ Theatrical Studies
- ☐ Music
- ☐ Physical Education / First Aid
- ☐ Religious Studies
- ☐ Design and Technology
- ☐ Home Economics
- ☐ Latin
- ☐ Accounting
- ☐ Other...

Return to school

Please answer by choosing the answer that best describes you.

26. When school life resumes to normal, which of the following tools would you like your teachers to continue using in class? \*

*Να επισημαίνεται μόνο μία έλλειψη ανά σειρά.*

|                                                                                             | Definitely<br>yes     | Probably<br>yes       | Probably<br>not       | Definitely<br>not     |
|---------------------------------------------------------------------------------------------|-----------------------|-----------------------|-----------------------|-----------------------|
| Synchronous instruction (the teacher is teaching while you are participating using your PC) | <input type="radio"/> | <input type="radio"/> | <input type="radio"/> | <input type="radio"/> |
| Videos                                                                                      | <input type="radio"/> | <input type="radio"/> | <input type="radio"/> | <input type="radio"/> |
| PowerPoint Presentations                                                                    | <input type="radio"/> | <input type="radio"/> | <input type="radio"/> | <input type="radio"/> |
| Handouts with theory or clarifications                                                      | <input type="radio"/> | <input type="radio"/> | <input type="radio"/> | <input type="radio"/> |
| Quizzes                                                                                     | <input type="radio"/> | <input type="radio"/> | <input type="radio"/> | <input type="radio"/> |
| Online discussion forums                                                                    | <input type="radio"/> | <input type="radio"/> | <input type="radio"/> | <input type="radio"/> |
| Simulations                                                                                 | <input type="radio"/> | <input type="radio"/> | <input type="radio"/> | <input type="radio"/> |
| Virtual Laboratories                                                                        | <input type="radio"/> | <input type="radio"/> | <input type="radio"/> | <input type="radio"/> |
| Social media (e.g., Facebook, Google+, Instagram, Twitter)                                  | <input type="radio"/> | <input type="radio"/> | <input type="radio"/> | <input type="radio"/> |
| Instant messaging (e.g. Messenger, Viber)                                                   | <input type="radio"/> | <input type="radio"/> | <input type="radio"/> | <input type="radio"/> |
| Online homework                                                                             | <input type="radio"/> | <input type="radio"/> | <input type="radio"/> | <input type="radio"/> |

Open-ended  
questions

Please also respond to the following open questions. Your opinion is very important to us.

27. 26. What did your teachers do or could have done to make you feel closer to your classmates while being away from school due to COVID-19?

---

---

---

---

---

28. How did you deal with the stress and pressure of this period (e.g. worrying about getting sick, not seeing your friends every day, etc.)?

---

29. What is or was your biggest concern/worry related to COVID-19 and its impact on your education?

---

---

---

---

---

30. If we were able to solve ONE of the problems you are or were facing during the COVID-19 school lockdown, what would that be?

---

---

---

---

---

**Thank you very much for your time! We will use your answers to try to make your educational experiences more enjoyable and rewarding.**

Αυτό το περιεχόμενο δεν έχει δημιουργηθεί και δεν έχει εγκριθεί από την Google.

Google Φόρμες
